# Supplementary material
Source: MDPI journal article supplement (https://www.mdpi.com/2813-0464/1/1/3)
Supplement: s1 [file s1]

Supplementary Materials

# Early Detection of Phototrophic Biofilms in the Polychrome Panel, El Castillo Cave, Spain

Valme Jurado <sup>1</sup>, Jose Luis Gonzalez-Pimentel <sup>2</sup>, Angel Fernandez-Cortes <sup>3</sup>, Tamara Martin-Pozas <sup>4</sup>, Roberto Ontañón <sup>5</sup>, Eduardo Palacio <sup>5</sup>, Bernardo Hermosin <sup>1</sup>, Sergio Sanchez-Moral <sup>4</sup> and Cesareo Saiz-Jimenez <sup>1,\*</sup>

<sup>1</sup> Instituto de Recursos Naturales y Agrobiología, IRNAS-CSIC, 41012 Sevilla, Spain; vjurado@irnase.csic.es (V.J.); b.hermosin@csic.es (B.H.)

<sup>2</sup> Laboratorio Hercules, Universidade de Evora, 7000-809 Evora, Portugal; pimentel@irnas.csic.es

<sup>3</sup> Departamento de Biología y Geología, Universidad de Almería, 04120 Almería, Spain; acortes@ual.es

<sup>4</sup> Museo Nacional de Ciencias Naturales, MNCN-CSIC, 28006 Madrid, Spain; tmpozas@mncn.csic.es (T.M.-P.); ssmilk@mncn.csic.es (S.S.-M.)

<sup>5</sup> Museo de Prehistoria y Arqueología de Cantabria–Cuevas Prehistoricas de Cantabria, 39009 Santander, Spain; ontanon\_r@cantabria.es (R.O.); palacio\_e@cantabria.es (E.P.)

\* Correspondence: saiz@irnase.csic.es

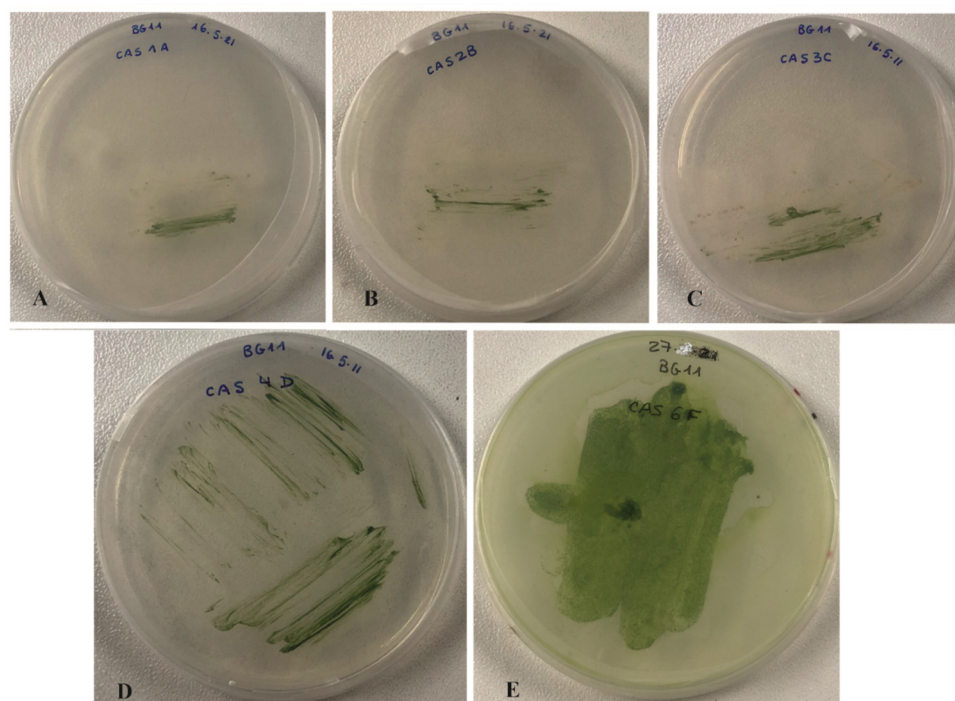

**Figure S1.** Samples grown in BG11 medium. **A:** Sample CAS1A. **B:** Sample CAS2B. **C:** Sample CAS3C. **D:** Sample CAS4D. **E:** Sample CAS6F.

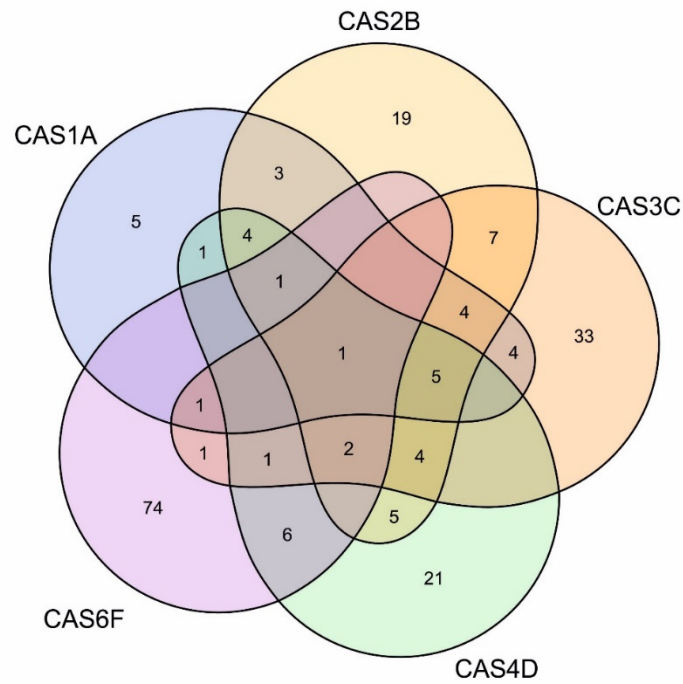

**Figure S2.** Prokaryotic community distribution in El Castillo Cave. Venn diagram showing the overlap between the ASVs generated by the five samples.

**Table S1.** Monthly data on visits to the cave (total, average and maximum daily visits) compared with the mean daily variations of temperature and CO<sub>2</sub> concentration for cave air.

| Month/Year                          | Visitors     |           |            | Mean Daily Variations (with Visitors) |                                          |
|-------------------------------------|--------------|-----------|------------|---------------------------------------|------------------------------------------|
|                                     | Total        | Daily avg | Daily max. | T (°C·day <sup>-1</sup> )             | CO <sub>2</sub> (ppm·day <sup>-1</sup> ) |
| 10/2020                             | 1621         | 60        | 115        | 0.101                                 | 68                                       |
| 11/2020                             | 184          | 14        | 67         | 0.050                                 | 68                                       |
| 12/2020                             | 419          | 28        | 70         | 0.065                                 | 59                                       |
| 01/2021                             | 493          | 21        | 51         | 0.045                                 | 49                                       |
| 02/2021                             | 756          | 33        | 84         | 0.067                                 | 57                                       |
| 03/2021                             | 887          | 35        | 114        | 0.069                                 | -                                        |
| 04/2021                             | 1529         | 59        | 111        | 0.070                                 | 57                                       |
| 05/2021                             | 1382         | 53        | 113        | 0.019                                 | 55                                       |
| 06/2021                             | 2195         | 84        | 129        | 0.115                                 | 112                                      |
| 07/2021                             | 3212         | 115       | 136        | 0.112                                 | 153                                      |
| 08/2021                             | 3183         | 118       | 145        | 0.125                                 | 118                                      |
| 09/2021                             | 2667         | 111       | 186        | 0.124                                 | 142                                      |
| <b>Annual</b>                       | <b>18528</b> | <b>61</b> | <b>110</b> | <b>0.083</b>                          | <b>85</b>                                |
| Days without visitors (yearly avg): |              |           |            | 0.019                                 | 72                                       |

**Table S2.** Description of samples from the Polychrome Panel, El Castillo Cave.

| Sample | Location and Description of the Samples                                |
|--------|------------------------------------------------------------------------|
| E1A    | Faint green stains in Polychrome Panel (Figure 2A,B)                   |
| E2B    | Faint green stain in Polychrome Panel (Figure 2C)                      |
| E3C    | Faint green stain in Polychrome Panel                                  |
| E4D    | Faint green stain in Polychrome Panel                                  |
| E6F    | Abundant biofilm in a spotlight away from Polychrome Panel (Figure 2D) |

**Table S3.** DNA concentration of samples from the Polychrome Panel, El Castillo Cave.

| Sample | Concentration (ng / $\mu$ L) |
|--------|------------------------------|
| E1A    | < 0.5                        |
| E2B    | < 0.5                        |
| E3C    | < 0.5                        |
| E4D    | < 0.5                        |
| E6F    | < 0.5                        |
| CAS1A  | 332.0                        |
| CAS2B  | 69.8                         |
| CAS3C  | 306.0                        |
| CAS4D  | 119.0                        |
| CAS6F  | 167.0                        |

**Table S4.** Number of ASVs, taxon richness and  $\alpha$ -diversity indexes for El Castillo Cave.

| Sample | ASV | Faith-pd | Shannon | Evenness |
|--------|-----|----------|---------|----------|
| CAS1A  | 29  | 3.74     | 3.54    | 0.73     |
| CAS2B  | 55  | 4.53     | 4.23    | 0.73     |
| CAS3C  | 63  | 6.68     | 4.63    | 0.77     |
| CAS4D  | 51  | 4.00     | 3.70    | 0.65     |
| CAS6F  | 87  | 5.72     | 4.06    | 0.63     |

**Table S5.** Prokaryotic ASVs distribution in El Castillo Cave.

| Domain            | CAS1A | CAS2B | CAS3C | CAS4D | CAS6F |
|-------------------|-------|-------|-------|-------|-------|
| <i>Bacteria</i> % | 99.9  | 100.0 | 100.0 | 99.9  | 100.0 |
| Unassigned %      | 0.1   | 0.0   | 0.0   | 0.1   | 0.0   |

**Table S6.** Eukaryotic ASVs distribution in El Castillo Cave.

| Domain             | CAS1A | CAS2B | CAS3C | CAS4D | CAS6F |
|--------------------|-------|-------|-------|-------|-------|
| <i>Eukaryota</i> % | 80.8  | 98.6  | 84.6  | 100.0 | 100.0 |
| Unassigned %       | 19.2  | 1.4   | 15.4  | 0.0   | 0.0   |
